# Supplementary material for: An Immuno-Clinic score model for evaluating T cell immunity and predicting early antiviral therapy effectiveness in chronic hepatitis B
Source: publisher site journal article supplement (doi:10.18632/aging.202274), 2020-12-26
Supplement: Supplementary file [file aging-v12i24-202274-supplementary-material-SD1.pdf]

SUPPLEMENTARY FIGURE

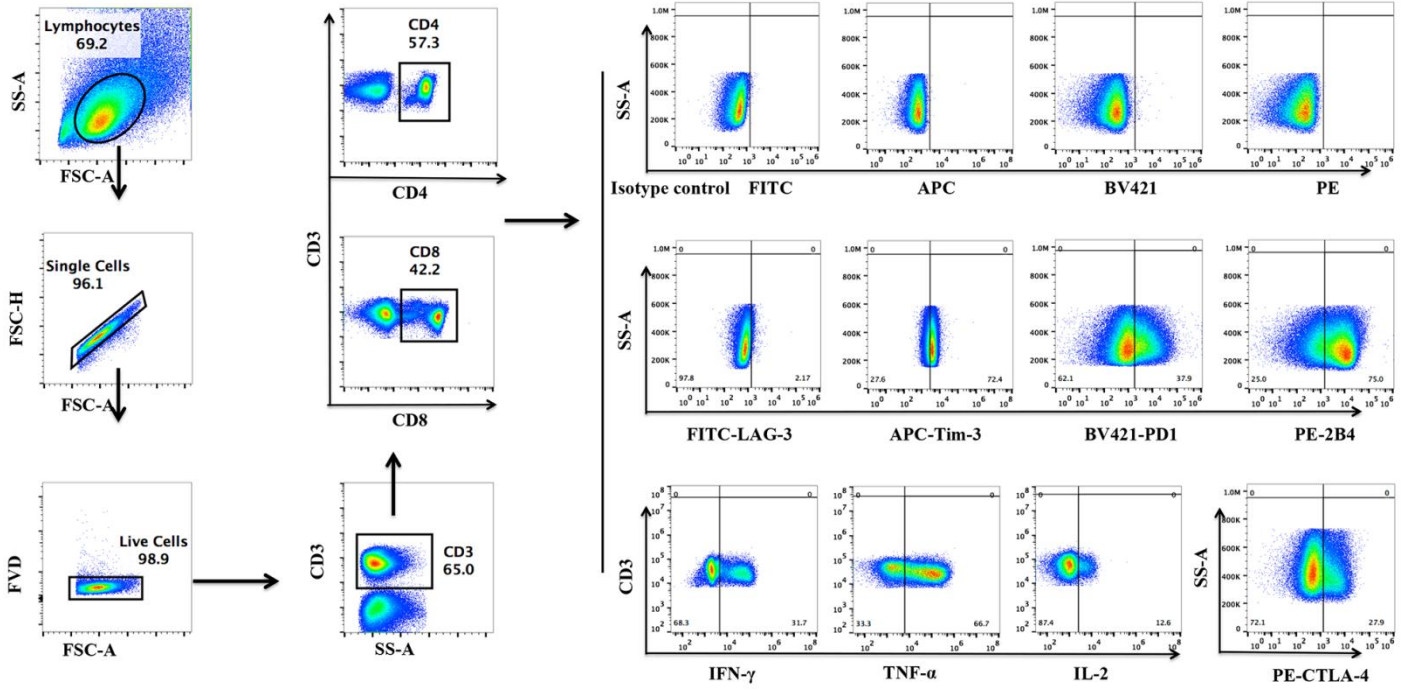

Supplementary Figure 1. The gating strategy for cytokines and exhaustion markers of T cells.
